# Supplementary material for: Synthesis and properties of five unexpected copper complexes with ring-cleavage of 3,6-di-2-pyridyl-1,2,4,5–tetrazine by one pot in situ hydrothermal reaction
Source: Royal Society of Chemistry journal article supplement (doi:10.1039/c2ce05785a), 2012-01-01
Supplement: c2ce05785a.pdf [file c2ce05785a.pdf]

## Electronic Supplementary Information (ESI)

### Synthesis and properties of five unexpected copper complexes with ring-cleavage of 3,6-di-2-pyridyl-1,2,4,5-tetrazine by one pot *in situ* hydrothermal reaction

Jiehu Cui,<sup>a</sup> Liangfang Huang,<sup>a</sup> Zhenzhong Lu,<sup>a</sup> Yizhi Li,<sup>a</sup> Zijian Guo<sup>a</sup> and Hegen Zheng<sup>a,b</sup>

<sup>a</sup>State Key Laboratory of Coordination Chemistry, School of Chemistry and Chemical Engineering, Nanjing National Laboratory of Microstructures, Nanjing University, Nanjing 210093, P. R. China

<sup>b</sup>State Key Laboratory of Structural Chemistry, Fujian Institute of Research on the Structure of Matter, Chinese Academy of Sciences, Fuzhou 350002, P. R. China  
E-mail: zhenghg@nju.edu.cn. Fax: 86-25-83314502.

| Contents                                                                                                                           | Page       |
|------------------------------------------------------------------------------------------------------------------------------------|------------|
| <b>Figures. S1-4.</b> FT-IR spectroscopy of the compounds <b>1, 2, 3</b> and <b>4</b> .                                            | <b>2-3</b> |
| <b>Figure. S5a.</b> UV absorbance spectra of <b>1, 2, 3, 4</b> and DPTZ.                                                           | <b>4</b>   |
| <b>Figure. S5b.</b> UV absorbance spectra of DPTZ in acetonitrile /water (1:3) solution, a: room temperature. b: 60 °C. c: 120 °C. | <b>4</b>   |
| <b>Figure. S5c.</b> The diffuse reflect solid-state UV/Vis spectra of <b>1, 2, 3, 4</b> and DPTZ.                                  | <b>5</b>   |
| <b>Figure. S5d.</b> XPS spectra of compound <b>3</b> .                                                                             | <b>5</b>   |
| <b>Figure. S5e.</b> The GC analysis of methanol.                                                                                   | <b>6</b>   |
| <b>Figures. S6-9.</b> Powder X-ray diffraction patterns of compounds <b>1, 2, 3</b> and <b>4</b> .                                 | <b>6-8</b> |
| <b>Figure S10.</b> The curves of TGA of <b>1, 2, 3</b> and <b>4</b> .                                                              | <b>8</b>   |
| <b>Tables S1-4.</b> Selected bond lengths (Å) and angles (deg) for compounds <b>1, 2, 3</b> and <b>4</b> .                         | <b>9</b>   |

**Figure S1.** FT-IR spectroscopy of the compound **1**.

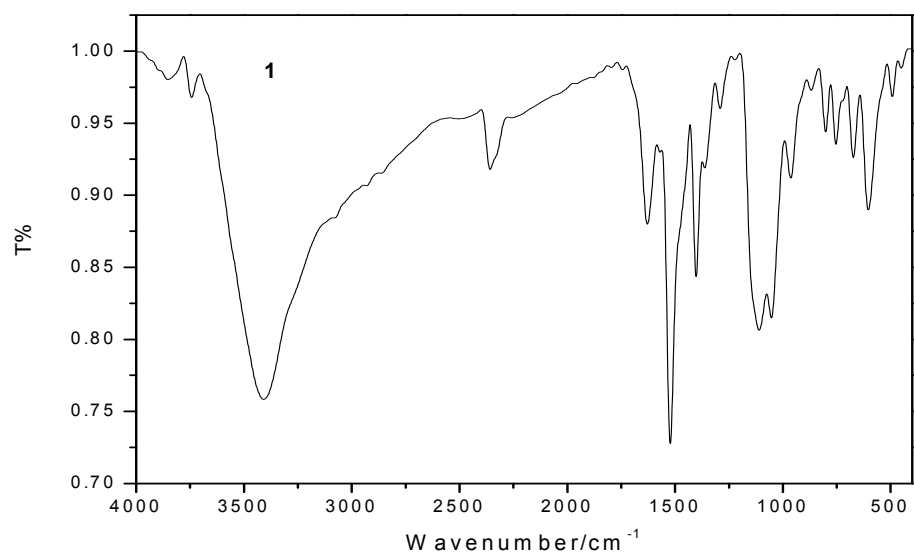

**Figure S2.** FT-IR spectroscopy of the compound **2**.

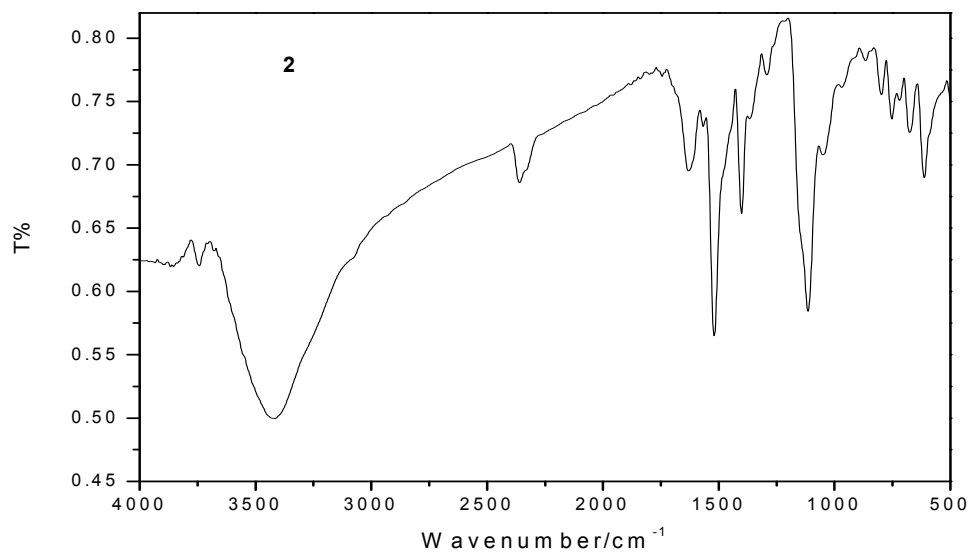

**Figure S3.** FT-IR spectroscopy of the compound **3**.

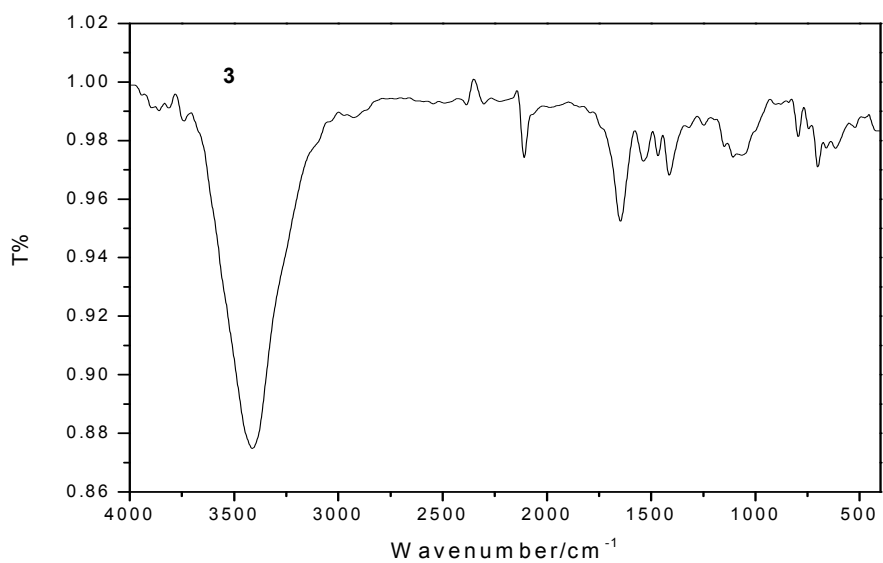

**Figure S4.** FT-IR spectroscopy of the compound **4**.

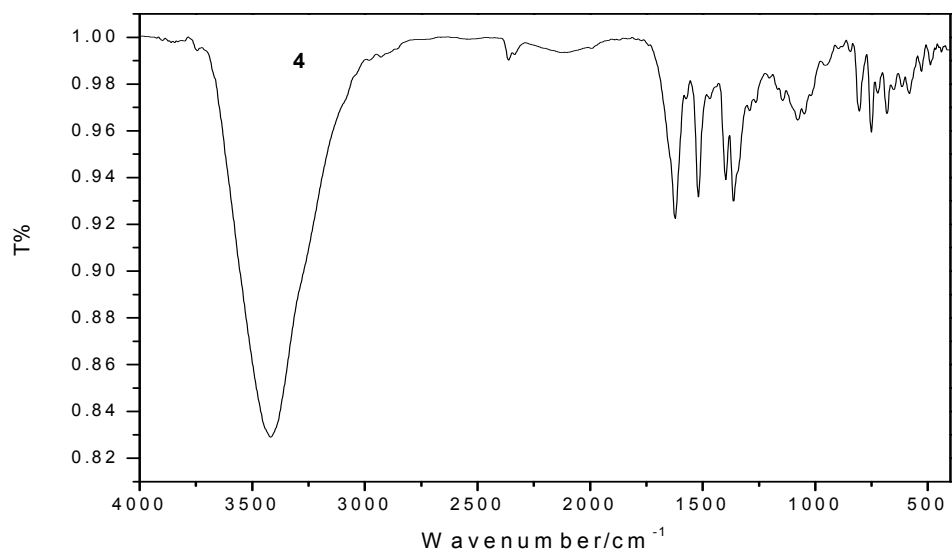

**Figure S5a.** UV absorbance spectra of **1** (in acetonitrile /water (1:3) with 120 °C ), **2** (in acetonitrile /water (3:1) with 120 °C), **3** (in acetonitrile /water (1:3) with 60 °C), **4** (in acetonitrile /water (1:3) with 120 °C), DPTZ in acetonitrile /water (1:3) solution with room temperature.

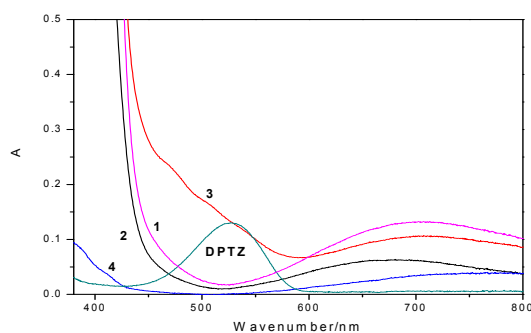

**Figure S5b.** UV absorbance spectra of DPTZ in acetonitrile /water (1:3) solution, a: room temperature. b: 60 °C. c: 120 °C.

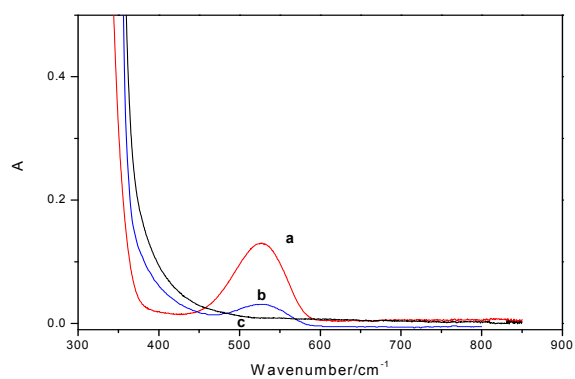

**Figure S5c.** The diffuse reflect solid-state UV/Vis spectra of **1**, **2**, **3**, **4** and DPTZ.

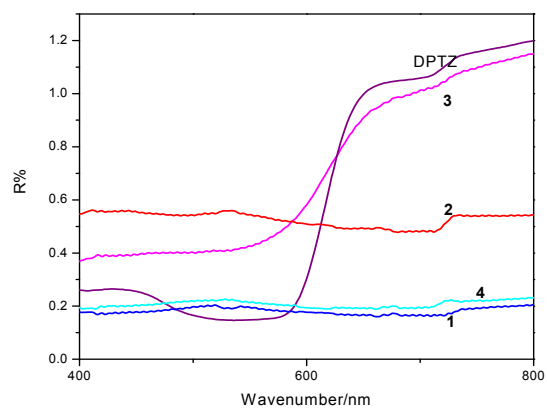

**Figure S5d.** XPS spectra of compound **3**.

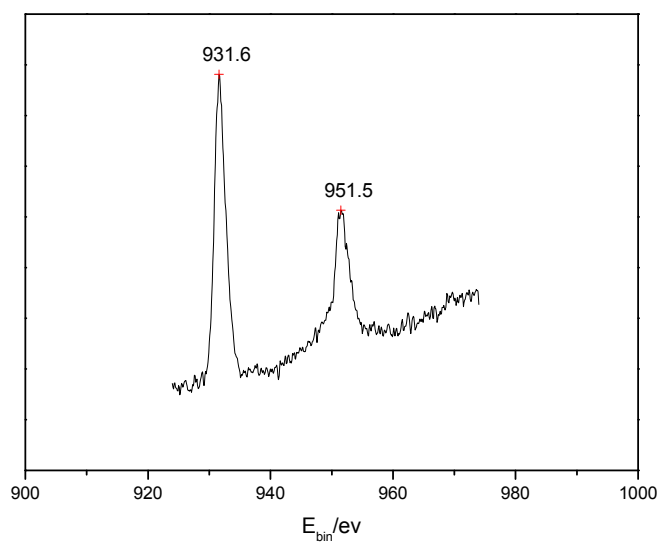

**Figure S5e.** The GC analysis of methanol.

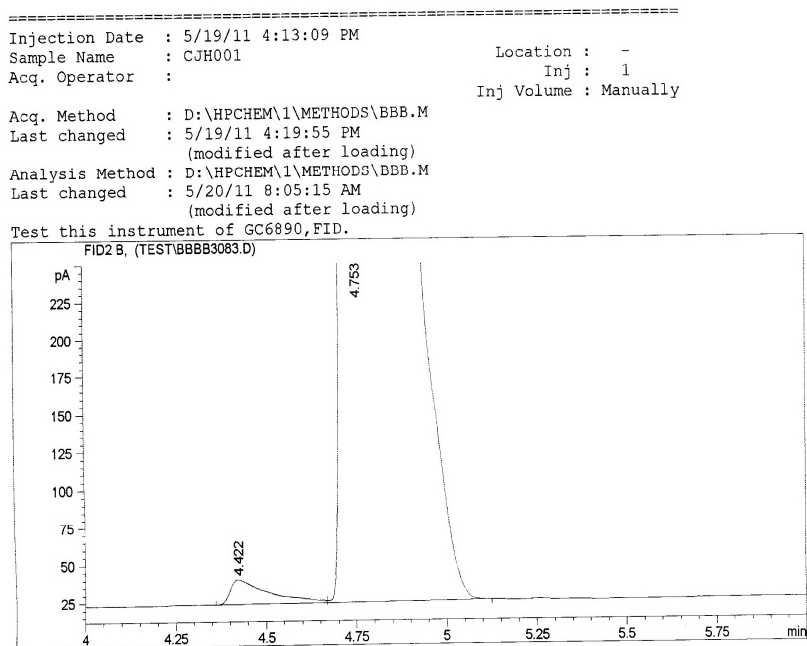

```
=====
Area Percent Report
=====
```

|            |   |        |
|------------|---|--------|
| Sorted By  | : | Signal |
| Multiplier | : | 1.0000 |
| Dilution   | : | 1.0000 |

Signal 1: FID2 B,

**Figure S6.** Powder x-ray diffraction patterns of compound 1.

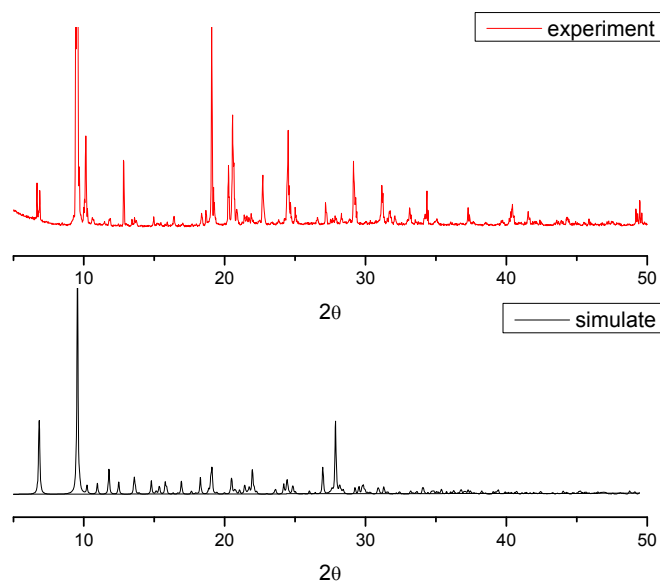

**Figure S7.** Powder x-ray diffraction patterns of compound **2**

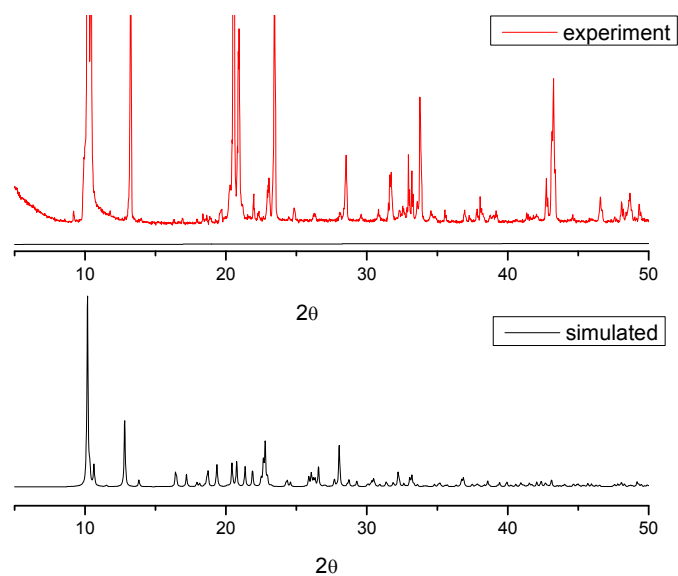

**Figure S8.** Powder x-ray diffraction patterns of compound **3**

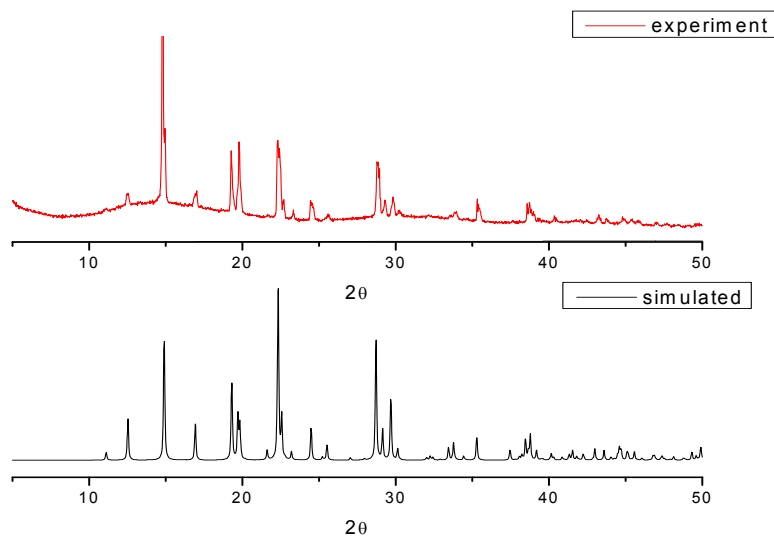

**Figure S9.** Powder x-ray diffraction patterns of compound **4**

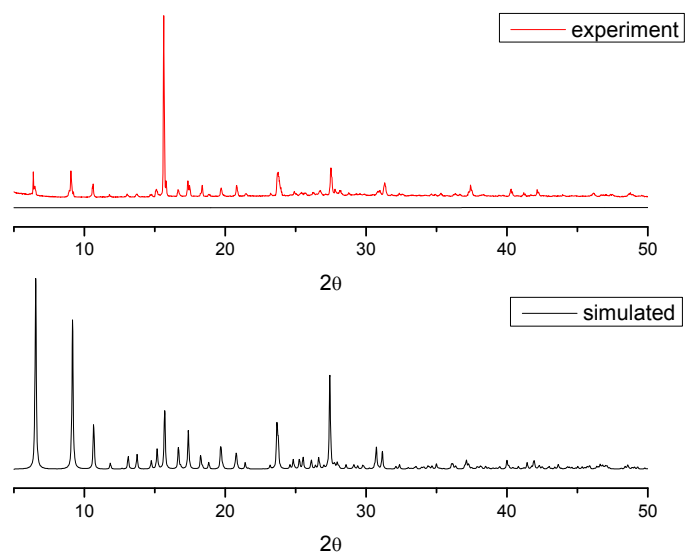

**Figure S10.** The curves of TGA of **1**, **2**, **3** and **4**

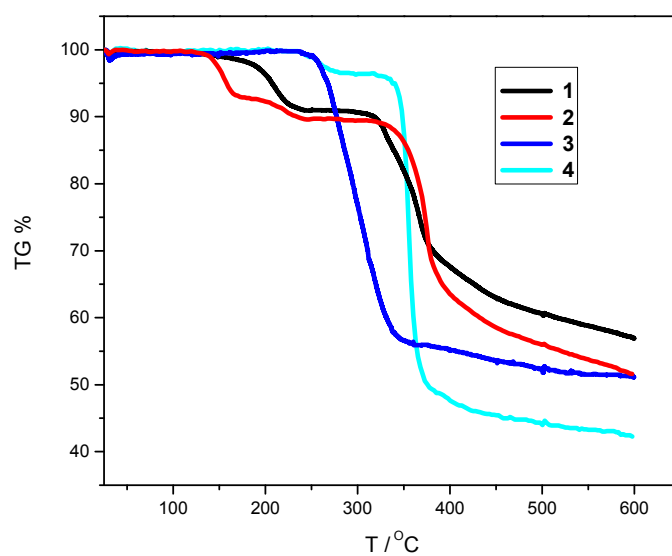



**Table S1.** Selected bond lengths (Å) and angles (deg) for compound **1**

|           |          |            |          |           |          |            |          |
|-----------|----------|------------|----------|-----------|----------|------------|----------|
| Cu1-N2    | 1.916(3) | Cu1-O10    | 1.955(2) | Cu1-O3    | 1.955(3) | Cu1-N1     | 1.962(3) |
| Cu1-O10   | 2.301(3) | Cu2-N7     | 1.903(3) | Cu2-O11   | 1.938(2) | Cu2-O4     | 1.956(3) |
| Cu2-N6    | 1.977(3) | Cu2-O11    | 2.345(3) | Cu3-O6    | 1.922(3) | Cu3-N5     | 1.984(3) |
| Cu3-O5    | 1.994(3) | Cu3-N3     | 2.015(3) | Cu3-O14   | 2.375(3) | Cu4-O7     | 1.924(3) |
| Cu4-N9    | 1.984(3) | Cu4-N8     | 2.026(3) | Cu4-O8    | 2.021(3) | Cu4-O9     | 2.275(3) |
| N2-N3     | 1.404(4) |            |          |           |          |            |          |
| O3-Cu1-N1 |          | 163.11(12) |          | N2-Cu1-N1 |          | 82.42(12)  |          |
| N2-Cu1-N1 |          | 82.42(12)  |          | N7-Cu2-O4 |          | 81.19(12)  |          |
| N5-Cu3-O5 |          | 91.23(12)  |          | O6-Cu3-N3 |          | 95.30(12)  |          |
| N5-Cu3-N3 |          | 81.90(12)  |          | O5-Cu3-N3 |          | 171.92(12) |          |

**Table S2.** selected bond lengths (Å) and angles (deg) for compound **2**

|             |          |            |          |             |          |            |          |
|-------------|----------|------------|----------|-------------|----------|------------|----------|
| O7-Cu1      | 2.281(3) | Cu1-O6     | 1.935(2) | Cu1-O5      | 1.983(2) | Cu1-N1     | 1.989(3) |
| Cu1-N2      | 2.013(3) | Cu1-O7     | 2.281(3) | Cu2-N3      | 1.923(3) | Cu2-O4     | 1.953(3) |
| Cu2-O8      | 1.950(3) | Cu2-N4     | 1.995(3) | Cu2-O3      | 2.331(3) |            |          |
| O5- Cu1- N1 |          | 89.52(12)  |          | O6- Cu1- N2 |          | 96.95(11)  |          |
| O5- Cu1- N2 |          | 170.44(11) |          | N1- Cu1- N2 |          | 82.00(12)  |          |
| N1- Cu1- O7 |          | 101.00(11) |          | N2- Cu1- O7 |          | 95.54(10)  |          |
| N3- Cu2- O4 |          | 176.78(14) |          | N3- Cu2- O8 |          | 81.27(11)  |          |
| O4- Cu2- O8 |          | 96.01(13)  |          | N3- Cu2- N4 |          | 81.86(11)  |          |
| O4- Cu2- N4 |          | 100.92(14) |          | O8- Cu2- N4 |          | 162.69(11) |          |
| N3- Cu2- O3 |          | 95.18(11)  |          | O4- Cu2- N4 |          | 100.92(14) |          |

**Table S3.** Selected bond lengths (Å) and angles (deg) for compound **3**

|           |          |            |          |           |          |            |          |
|-----------|----------|------------|----------|-----------|----------|------------|----------|
| Cu1-C7    | 1.892(3) | Cu1-N3     | 1.926(3) | Cu1-N1    | 2.241(3) | Cu1-N2     | 2.365(3) |
|           |          |            |          |           |          |            |          |
| C7-Cu1-N3 |          | 147.65(15) |          | C7-Cu1-N1 |          | 106.99(13) |          |
| N3-Cu1-N1 |          | 102.35(11) |          | C7-Cu1-N2 |          | 100.20(13) |          |
| N3-Cu1-N2 |          | 100.77(12) |          | N1-Cu1-N2 |          | 73.86(10)  |          |

**Table S4.** Selected bond lengths (Å) and angles (deg) for compound **4**

|            |          |            |          |            |          |            |          |
|------------|----------|------------|----------|------------|----------|------------|----------|
| Cu1-O7     | 1.945(3) | Cu1-O6     | 1.951(3) | Cu1-N5     | 1.982(4) | Cu1-N2     | 1.998(3) |
| O1-Cu1     | 2.357(3) | Cu2-O3     | 1.889(3) | Cu2-N1     | 1.916(4) | Cu2-N3     | 2.016(4) |
| O7-Cu1-O6  |          | 90.65(13)  |          | O7-Cu1-N5  |          | 161.29(14) |          |
| O6- Cu1-N5 |          | 91.43(15)  |          | O7-Cu1-N2  |          | 93.45(14)  |          |
| O6-Cu1-N2  |          | 169.99(15) |          | N5-Cu1-N2  |          | 81.80(15)  |          |
| O7-Cu1-O1  |          | 96.81(12)  |          | N1-Cu2-N3  |          | 81.22(16)  |          |
| N5-Cu1-O1  |          | 101.83(13) |          | N2- Cu1-O1 |          | 97.11(13)  |          |
| O3-Cu2-N1  |          | 177.41(16) |          | O3-Cu2-N3  |          | 98.07(16)  |          |
